# Supplementary material for: Training loads and injury risk in Australian football—differing acute: chronic workload ratios influence match injury risk
Source: PubMed Central journal article supplement — Br J Sports Med. 2016 Oct 27;51(16):1215–20. doi: 10.1136/bjsports-2016-096309 (PMC5537557; doi:10.1136/bjsports-2016-096309), 2016-10-27
Supplement: bjsports-2016-096309supp001.pdf [file bjsports-2016-096309supp001.pdf]

Table S1: Site and activity of time-loss non-contact injuries

| <b>Activity<br/>Site</b>                                                                                 | <b>Match</b> | <b>Training</b> | <b>Running<br/>conditioning</b> | <b>Cross<br/>Training</b> | <b>Non-<br/>training</b> | <b>Total</b> |
|----------------------------------------------------------------------------------------------------------|--------------|-----------------|---------------------------------|---------------------------|--------------------------|--------------|
| <b>Ankle &amp;<br/>foot</b>                                                                              | 10           | 11              | 3                               | 2                         | 5                        | <b>31</b>    |
| <b>Hip &amp; groin</b>                                                                                   | 10           | 6               | 2                               | 0                         | 1                        | <b>19</b>    |
| <b>Knee</b>                                                                                              | 8            | 5               | 0                               | 3                         | 5                        | <b>21</b>    |
| <b>Lower Leg</b>                                                                                         | 5            | 9               | 4                               | 0                         | 0                        | <b>18</b>    |
| <b>Pelvis &amp;<br/>buttock</b>                                                                          | 1            | 5               | 0                               | 0                         | 2                        | <b>8</b>     |
| <b>Thigh</b>                                                                                             | 15           | 18              | 6                               | 5                         | 2                        | <b>46</b>    |
| <b>Lumbar<br/>spine</b>                                                                                  | 5            | 10              | 3                               | 3                         | 1                        | <b>22</b>    |
| <b>Upper body<br/>(chest, neck,<br/>shoulder,<br/>thoracic<br/>spine &amp;<br/>trunk/<br/>abdominal)</b> | 5            | 4               | 0                               | 1                         | 3                        | <b>13</b>    |
| <b>Total pre-<br/>competition<br/>phase</b>                                                              | <b>0</b>     | <b>34</b>       | <b>15</b>                       | <b>8</b>                  | <b>8</b>                 | <b>65</b>    |
| <b>Total<br/>competitive<br/>phase</b>                                                                   | <b>59</b>    | <b>34</b>       | <b>3</b>                        | <b>6</b>                  | <b>11</b>                | <b>113</b>   |
| <b>Total</b>                                                                                             | <b>59</b>    | <b>68</b>       | <b>18</b>                       | <b>14</b>                 | <b>19</b>                | <b>178</b>   |

Table S2: Relative risk of non-contact time-loss injury in matches (+next 2 days)

| <b>Acute</b> | <b>Chronic</b> | <b>Variable</b>              | <b>Relative<br/>risk</b> | <b>95%CI<br/>lower</b> | <b>95%CI<br/>upper</b> | <b>Mean R<sup>2</sup></b> |
|--------------|----------------|------------------------------|--------------------------|------------------------|------------------------|---------------------------|
| 3            | 28             | Moderate<br>speed<br>running | 2.29                     | 1.14                   | 4.58                   | 0.72                      |

|   |    |                        |      |      |      |      |
|---|----|------------------------|------|------|------|------|
| 5 | 14 | Moderate speed running | 2.28 | 1.14 | 4.56 | 0.19 |
| 3 | 21 | Moderate speed running | 2.15 | 1.08 | 4.30 | 0.76 |
| 5 | 14 | High speed running     | 2.07 | 1.04 | 4.13 | 0.18 |
| 9 | 18 | Session-RPE            | 2.02 | 1.26 | 3.26 | 0.49 |
| 9 | 28 | Session-RPE            | 1.77 | 1.11 | 2.82 | 0.12 |
| 8 | 32 | Distance-load          | 1.68 | 1.05 | 2.71 | 0.36 |
| 9 | 35 | Distance               | 1.68 | 1.03 | 2.75 | 0.39 |
| 9 | 28 | High speed running     | 1.67 | 1.03 | 2.71 | 0.46 |
| 9 | 28 | Player Load            | 1.65 | 1.01 | 2.69 | 0.50 |
| 9 | 32 | Session-RPE            | 1.63 | 1.02 | 2.60 | 0.20 |

Table S3: Relative risk of non-contact time-loss injury in matches (+next 5 days)

| <b>Acute</b> | <b>Chronic</b> | <b>Variable</b>        | <b>Relative risk</b> | <b>95%CI lower</b> | <b>95%CI upper</b> | <b>Mean R<sup>2</sup></b> |
|--------------|----------------|------------------------|----------------------|--------------------|--------------------|---------------------------|
| 3            | 28             | Moderate speed running | 2.33                 | 1.25               | 4.35               | 0.61                      |
| 5            | 14             | Moderate speed running | 2.08                 | 1.14               | 3.80               | 0.08                      |
| 3            | 32             | Moderate speed running | 2.01                 | 1.08               | 3.76               | 0.51                      |
| 3            | 21             | Moderate speed running | 1.98                 | 1.08               | 3.61               | 0.82                      |
| 3            | 18             | Session-RPE            | 1.97                 | 1.06               | 3.68               | 0.32                      |
| 5            | 14             | High speed running     | 1.89                 | 1.04               | 3.44               | 0.12                      |
| 6            | 14             | Moderate speed running | 1.87                 | 1.11               | 3.16               | 0.63                      |
| 9            | 35             | Distance               | 1.86                 | 1.21               | 2.87               | 0.31                      |
| 9            | 18             | Session-RPE            | 1.84                 | 1.20               | 2.84               | 0.54                      |

|   |    |                        |      |      |      |      |
|---|----|------------------------|------|------|------|------|
| 3 | 35 | Moderate speed running | 1.81 | 1.01 | 3.25 | 0.39 |
| 3 | 14 | Moderate speed running | 1.80 | 1.02 | 3.16 | 0.56 |
| 9 | 28 | Session-RPE            | 1.69 | 1.11 | 2.57 | 0.22 |
| 9 | 28 | High speed running     | 1.66 | 1.08 | 2.55 | 0.49 |
| 6 | 14 | Player Load            | 1.61 | 1.02 | 2.56 | 0.75 |
| 9 | 32 | Session-RPE            | 1.59 | 1.04 | 2.42 | 0.40 |
| 9 | 28 | Distance               | 1.58 | 1.01 | 2.49 | 0.74 |
| 6 | 14 | Distance               | 1.58 | 1.00 | 2.50 | 0.50 |
| 9 | 35 | Session-RPE            | 1.53 | 1.01 | 2.33 | 0.16 |
